# Supplementary material for: The Impact of Losing in a Competition on the Willingness to Seek Further Challenges
Source: Atypon-hosted journal article supplement (doi:10.1287/mnsc.2015.2321), 2016-02-12

Online Appendix: The impact of losing in a  
competition on the willingness to seek further  
challenges

Thomas Buser\*

July 24, 2015

---

\*University of Amsterdam. t.buser@uva.nl. School of Economics, Roetersstraat 11, 1018WB Amsterdam, The Netherlands.

# Robustness checks

Table 1: Poisson and probit regressions controlling for score polynomial

|                            | Challenge:         |                    |                     | Score:              |                     |                      | Success:           |                     |  | Earnings: |  |  |
|----------------------------|--------------------|--------------------|---------------------|---------------------|---------------------|----------------------|--------------------|---------------------|--|-----------|--|--|
|                            | (1)                | (2)                | (3)                 | (4)                 | (5)                 | (6)                  | (7)                | (8)                 |  |           |  |  |
| Losers (vs. winners)       | 0.057**<br>(0.027) | 0.064**<br>(0.027) | -0.079**<br>(0.038) | -0.078**<br>(0.037) | -0.700**<br>(0.338) | -0.778**<br>(0.394)  | -0.191*<br>(0.116) | -0.187*<br>(0.113)  |  |           |  |  |
| Female                     |                    | -0.028<br>(0.027)  |                     | -0.023<br>(0.034)   |                     | -0.871***<br>(0.284) |                    | -0.194**<br>(0.081) |  |           |  |  |
| Age                        |                    | -0.003<br>(0.004)  |                     | -0.007<br>(0.007)   |                     | -0.013<br>(0.058)    |                    | -0.001<br>(0.018)   |  |           |  |  |
| N                          | 122                | 122                | 122                 | 122                 | 122                 | 122                  | 122                | 122                 |  |           |  |  |
| Losers (vs. no info)       | 0.045<br>(0.030)   | 0.045<br>(0.030)   | 0.001<br>(0.039)    | -0.002<br>(0.039)   | -0.016<br>(0.270)   | 0.000<br>(0.269)     | 0.027<br>(0.114)   | 0.025<br>(0.115)    |  |           |  |  |
| Winners (vs. no info)      | -0.007<br>(0.024)  | -0.011<br>(0.024)  | 0.087**<br>(0.034)  | 0.083**<br>(0.033)  | 0.604**<br>(0.298)  | 0.665**<br>(0.305)   | 0.212**<br>(0.105) | 0.222**<br>(0.107)  |  |           |  |  |
| Female                     |                    | -0.023<br>(0.022)  |                     | 0.004<br>(0.028)    |                     | -0.370*<br>(0.224)   |                    | -0.139*<br>(0.076)  |  |           |  |  |
| Age                        |                    | -0.000<br>(0.004)  |                     | -0.005<br>(0.005)   |                     | -0.005<br>(0.038)    |                    | 0.003<br>(0.015)    |  |           |  |  |
| Winners vs losers p-val.   | 0.067              | 0.044              | 0.021               | 0.021               | 0.051               | 0.044                | 0.084              | 0.073               |  |           |  |  |
| N                          | 178                | 178                | 178                 | 178                 | 178                 | 178                  | 178                | 178                 |  |           |  |  |
| 3rd-order score polynomial | ✓                  | ✓                  | ✓                   | ✓                   | ✓                   | ✓                    | ✓                  | ✓                   |  |           |  |  |
| Session FE                 |                    | ✓                  |                     | ✓                   |                     | ✓                    |                    | ✓                   |  |           |  |  |

Robust standard errors in parentheses; \*  $p < 0.10$ , \*\*  $p < 0.05$ , \*\*\*  $p < 0.01$ . Coefficients are from poisson regressions except for coefficients in columns 7 to 9 which are from probit regressions. The sample in the upper panel regressions consists of all participants who scored between 5 and 15 points in the competition round and received feedback on the competition outcome. The sample in the lower panel regressions consists of all participants who scored between 5 and 15 points. The winners vs. losers p-values are from post-estimation Wald tests.

Table 2: OLS regressions controlling for score-fixed effects

|                          | Challenge:        |                    |                     | Score:              |                     |                     | Success:           |                     |  | Earnings: |  |  |
|--------------------------|-------------------|--------------------|---------------------|---------------------|---------------------|---------------------|--------------------|---------------------|--|-----------|--|--|
|                          | (1)               | (2)                | (3)                 | (4)                 | (5)                 | (6)                 | (7)                | (8)                 |  |           |  |  |
| Losers (vs. winners)     | 0.557*<br>(0.299) | 0.614**<br>(0.292) | -0.881**<br>(0.433) | -0.886**<br>(0.422) | -0.186**<br>(0.094) | -0.180**<br>(0.091) | -1.621*<br>(0.928) | -1.588*<br>(0.918)  |  |           |  |  |
| Female                   |                   | -0.313<br>(0.253)  |                     | -0.193<br>(0.402)   |                     | -0.141**<br>(0.069) |                    | -1.488**<br>(0.669) |  |           |  |  |
| Age                      |                   | -0.019<br>(0.043)  |                     | -0.065<br>(0.085)   |                     | -0.001<br>(0.015)   |                    | -0.001<br>(0.157)   |  |           |  |  |
| N                        | 122               | 122                | 122                 | 122                 | 122                 | 122                 | 122                | 122                 |  |           |  |  |
| Losers (vs. no info)     | 0.390<br>(0.269)  | 0.380<br>(0.276)   | -0.035<br>(0.373)   | -0.045<br>(0.390)   | -0.016<br>(0.076)   | -0.019<br>(0.081)   | 0.020<br>(0.696)   | -0.023<br>(0.738)   |  |           |  |  |
| Winners (vs. no info)    | -0.037<br>(0.230) | -0.077<br>(0.241)  | 0.972**<br>(0.380)  | 0.946**<br>(0.378)  | 0.155**<br>(0.076)  | 0.155*<br>(0.080)   | 1.661**<br>(0.767) | 1.712**<br>(0.798)  |  |           |  |  |
| Female                   |                   | -0.206<br>(0.201)  |                     | 0.125<br>(0.307)    |                     | -0.084<br>(0.061)   |                    | -1.004*<br>(0.580)  |  |           |  |  |
| Age                      |                   | -0.004<br>(0.034)  |                     | -0.057<br>(0.061)   |                     | 0.001<br>(0.011)    |                    | 0.031<br>(0.116)    |  |           |  |  |
| Winners vs losers p-val. | 0.130             | 0.105              | 0.014               | 0.013               | 0.044               | 0.044               | 0.047              | 0.040               |  |           |  |  |
| N                        | 178               | 178                | 178                 | 178                 | 178                 | 178                 | 178                | 178                 |  |           |  |  |
| Score FE                 | ✓                 | ✓                  | ✓                   | ✓                   | ✓                   | ✓                   | ✓                  | ✓                   |  |           |  |  |
| Session FE               |                   | ✓                  |                     | ✓                   |                     | ✓                   |                    | ✓                   |  |           |  |  |

Robust standard errors in parentheses; \*  $p < 0.10$ , \*\*  $p < 0.05$ , \*\*\*  $p < 0.01$ . The sample in the upper panel regressions consists of all participants who scored between 5 and 15 points in the competition round and received feedback on the competition outcome. The sample in the lower panel regressions consists of all participants who scored between 5 and 15 points. The winners vs. losers p-values are from post-estimation Wald tests.

Table 3: Poisson and probit regressions controlling for score-fixed effects

|                          | Challenge:         |                    |                     | Score:              |                     |                      | Success:           |                     |  | Earnings: |  |  |
|--------------------------|--------------------|--------------------|---------------------|---------------------|---------------------|----------------------|--------------------|---------------------|--|-----------|--|--|
|                          | (1)                | (2)                | (3)                 | (4)                 | (5)                 | (6)                  | (7)                | (8)                 |  |           |  |  |
| Losers (vs. winners)     | 0.060**<br>(0.031) | 0.068**<br>(0.028) | -0.084**<br>(0.039) | -0.083**<br>(0.036) | -0.787**<br>(0.391) | -1.001**<br>(0.441)  | -0.221*<br>(0.125) | -0.222*<br>(0.119)  |  |           |  |  |
| Female                   |                    | -0.036<br>(0.027)  |                     | -0.021<br>(0.037)   |                     | -1.110***<br>(0.396) |                    | -0.212**<br>(0.092) |  |           |  |  |
| Age                      |                    | -0.003<br>(0.004)  |                     | -0.005<br>(0.007)   |                     | -0.006<br>(0.060)    |                    | 0.003<br>(0.020)    |  |           |  |  |
| N                        | 122                | 122                | 122                 | 122                 | 122                 | 122                  | 122                | 122                 |  |           |  |  |
| Losers (vs. no info)     | 0.048<br>(0.031)   | 0.049<br>(0.031)   | -0.006<br>(0.039)   | -0.007<br>(0.040)   | -0.103<br>(0.286)   | -0.050<br>(0.292)    | 0.004<br>(0.110)   | 0.005<br>(0.114)    |  |           |  |  |
| Winners (vs. no info)    | -0.002<br>(0.024)  | -0.005<br>(0.024)  | 0.088***<br>(0.034) | 0.085**<br>(0.033)  | 0.622*<br>(0.324)   | 0.739**<br>(0.324)   | 0.222**<br>(0.105) | 0.238**<br>(0.106)  |  |           |  |  |
| Female                   |                    | -0.025<br>(0.022)  |                     | 0.011<br>(0.029)    |                     | -0.409<br>(0.254)    |                    | -0.153*<br>(0.081)  |  |           |  |  |
| Age                      |                    | -0.001<br>(0.004)  |                     | -0.005<br>(0.006)   |                     | 0.005<br>(0.044)     |                    | 0.006<br>(0.015)    |  |           |  |  |
| Winners vs losers p-val. | 0.103              | 0.066              | 0.014               | 0.012               | 0.046               | 0.029                | 0.052              | 0.039               |  |           |  |  |
| N                        | 178                | 178                | 178                 | 178                 | 178                 | 178                  | 178                | 178                 |  |           |  |  |
| Score FE                 | ✓                  | ✓                  | ✓                   | ✓                   | ✓                   | ✓                    | ✓                  | ✓                   |  |           |  |  |
| Session FE               |                    | ✓                  |                     | ✓                   |                     | ✓                    |                    | ✓                   |  |           |  |  |

Robust standard errors in parentheses; \*  $p < 0.10$ , \*\*  $p < 0.05$ , \*\*\*  $p < 0.01$ . Coefficients are from poisson regressions except for coefficients in columns 7 to 9 which are from probit regressions. The sample in the upper panel regressions consists of all participants who scored between 5 and 15 points in the competition round and received feedback on the competition outcome. The sample in the lower panel regressions consists of all participants who scored between 5 and 15 points. The winners vs. losers p-values are from post-estimation Wald tests.

## Screen shots (main experiment)

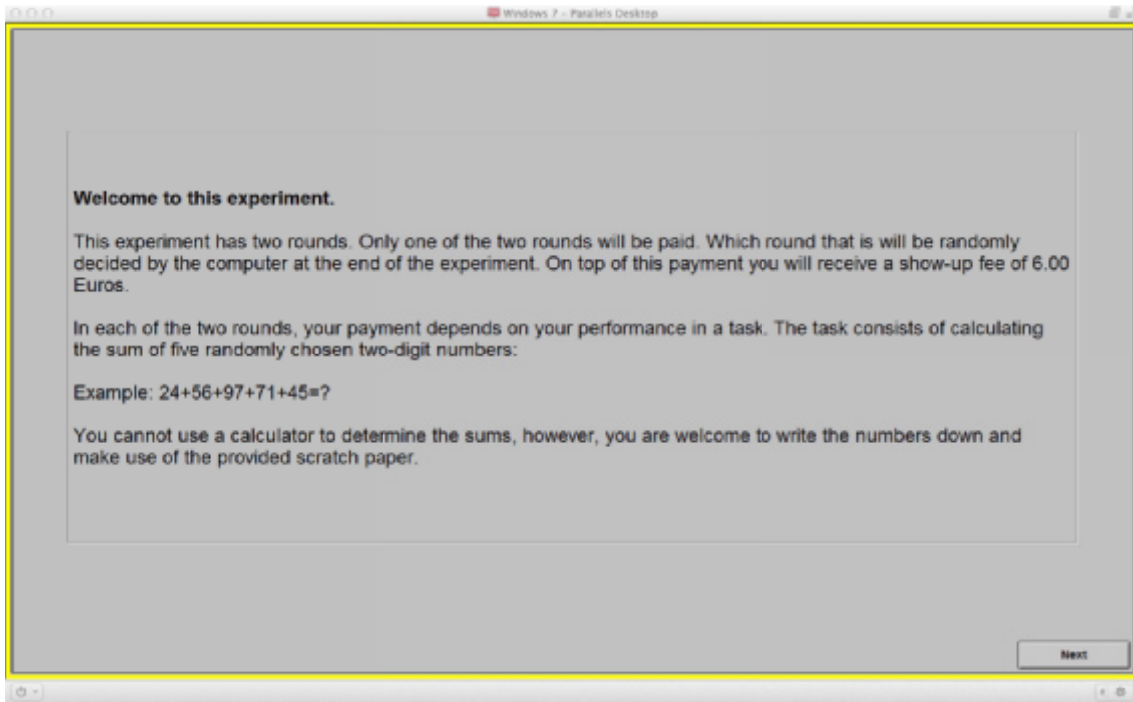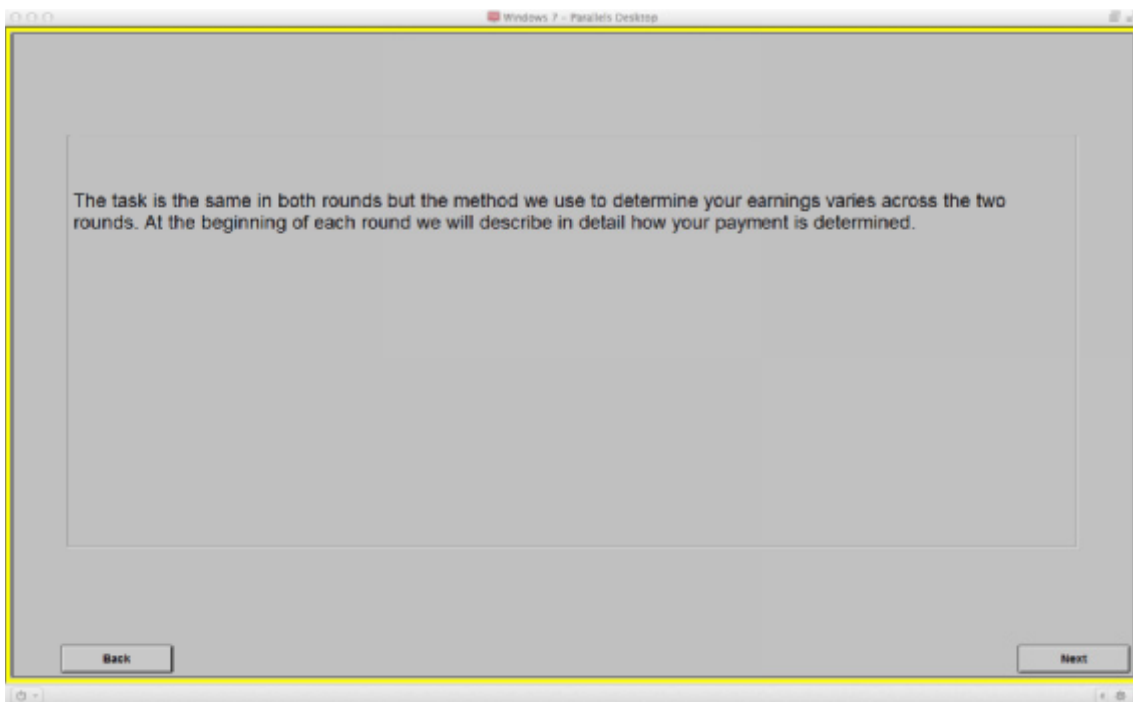

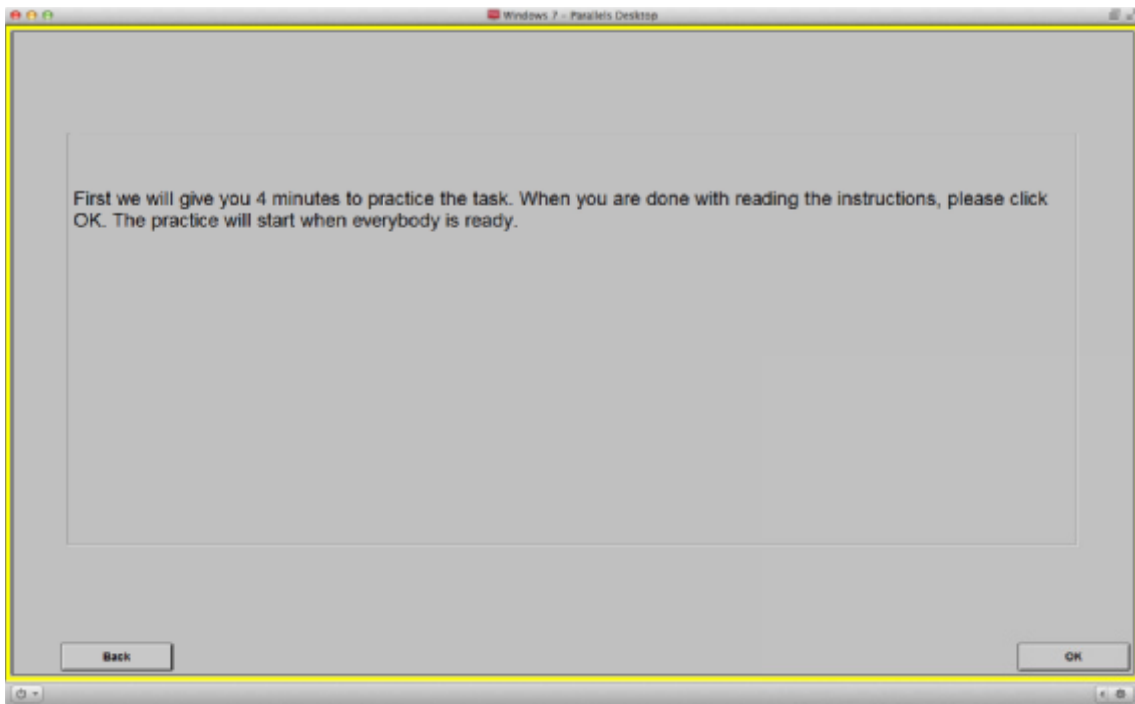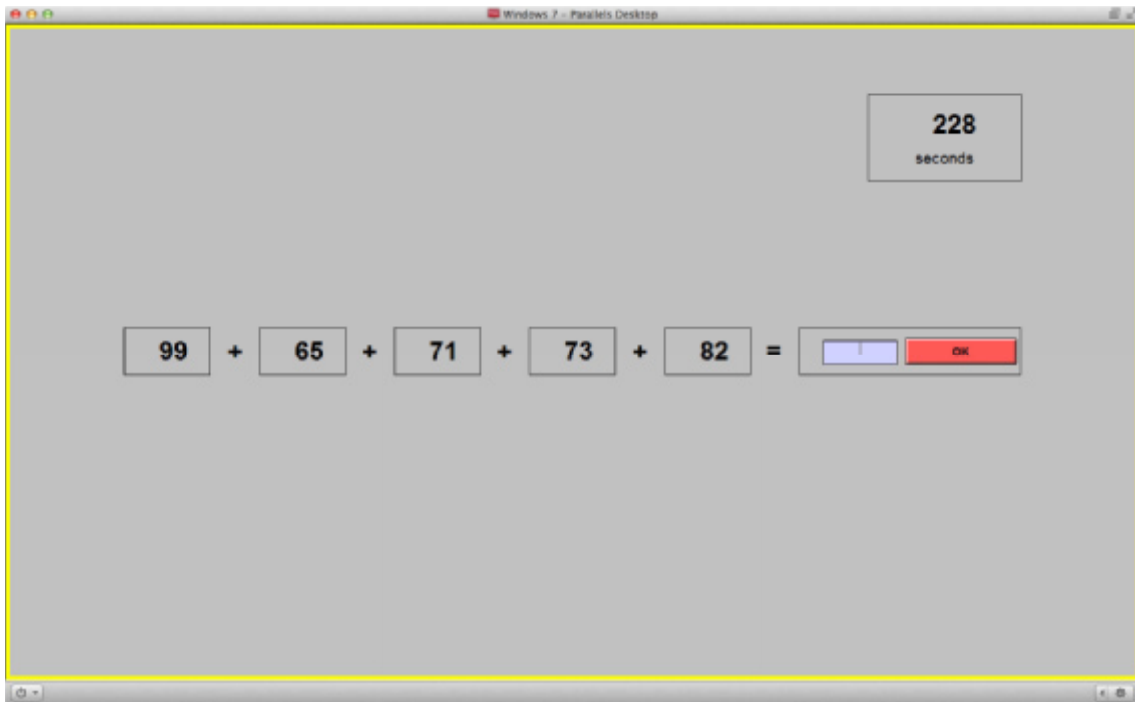

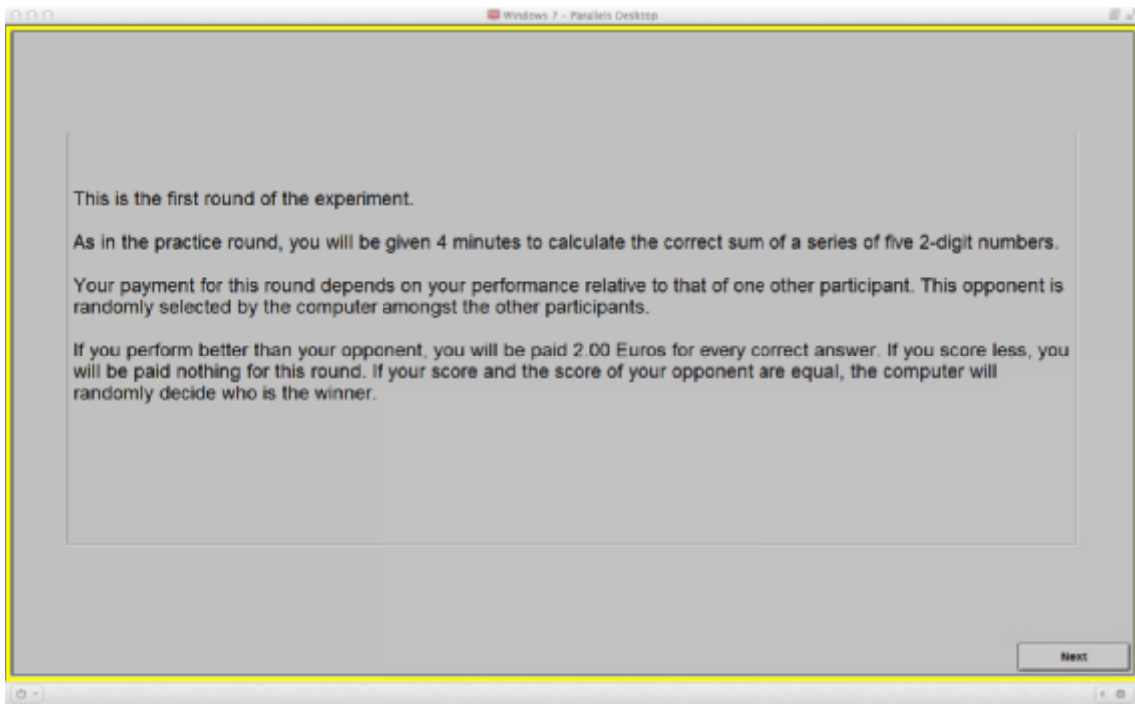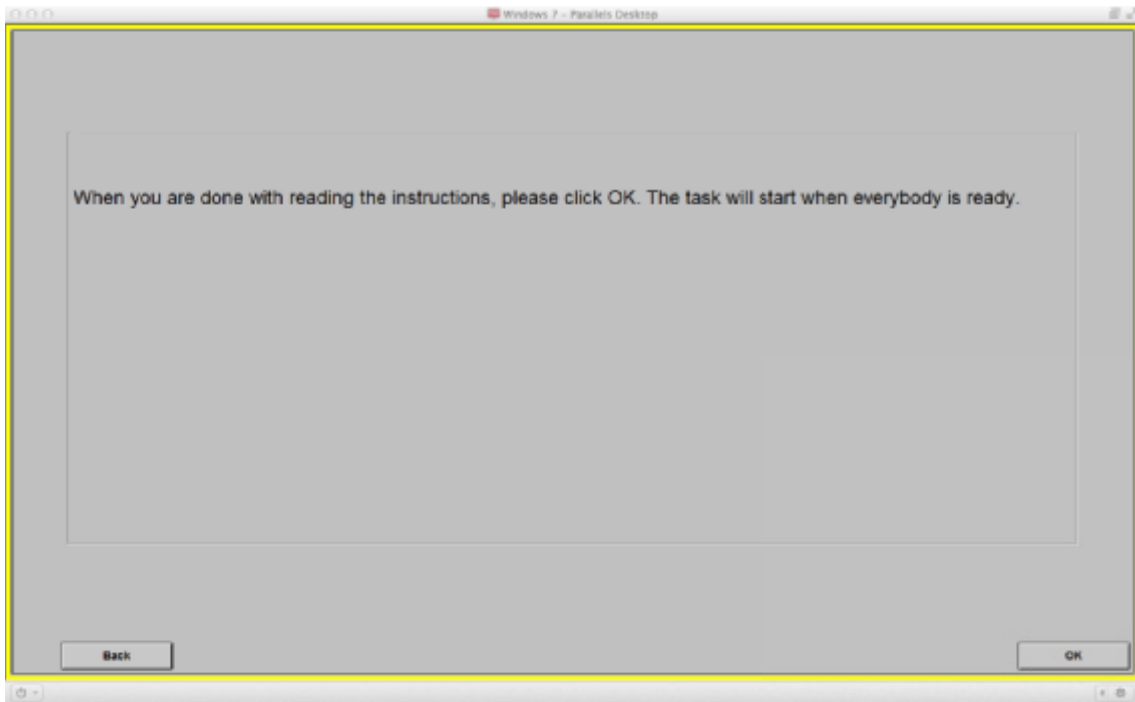

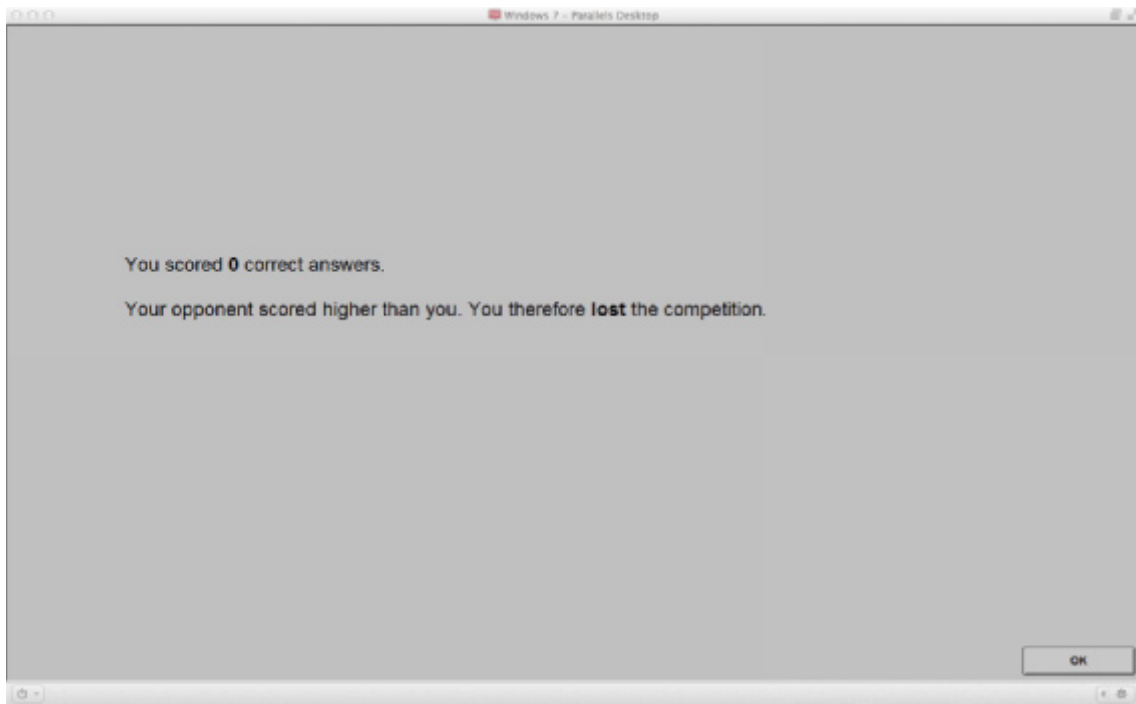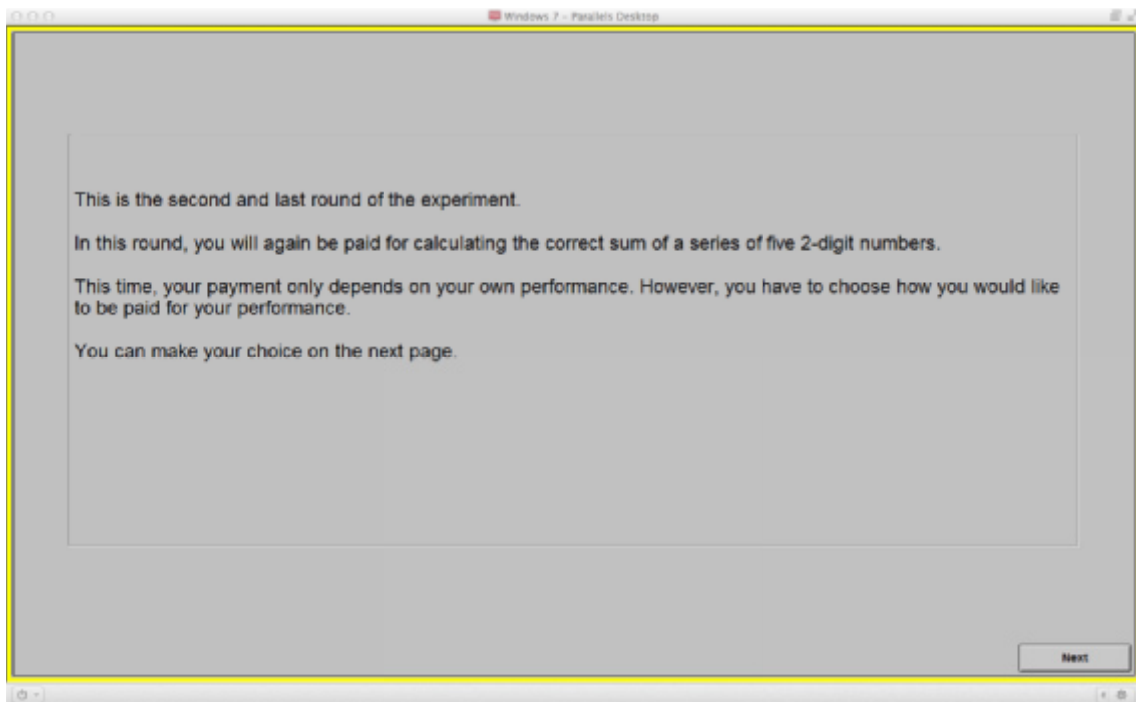

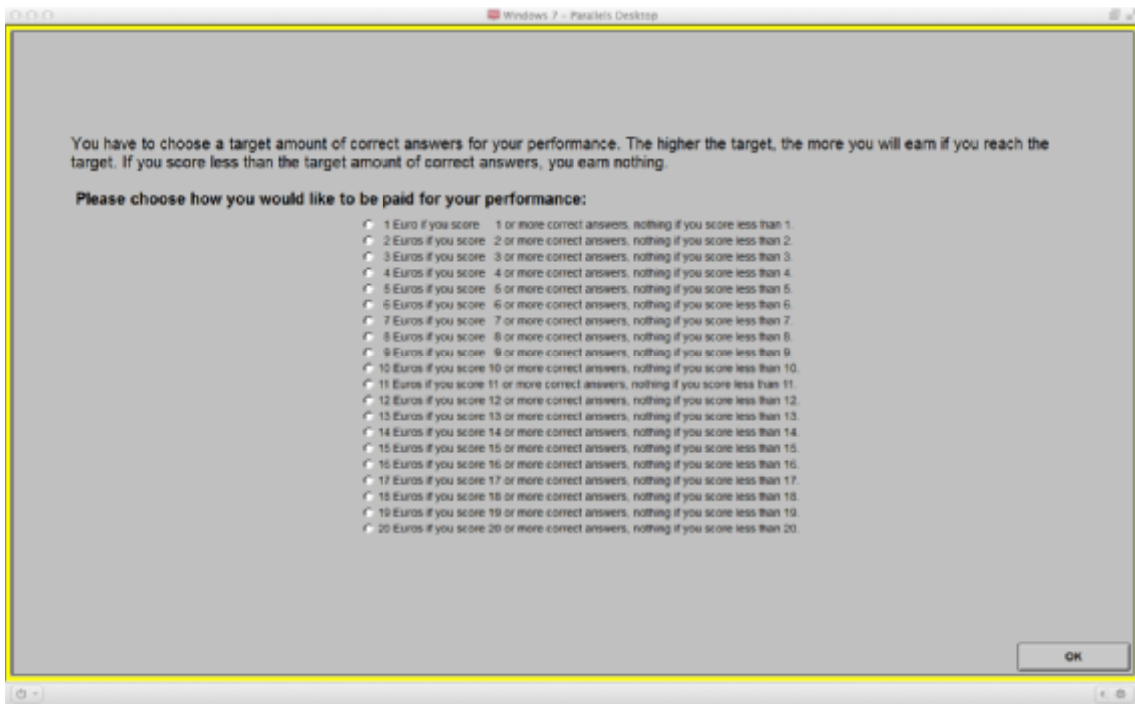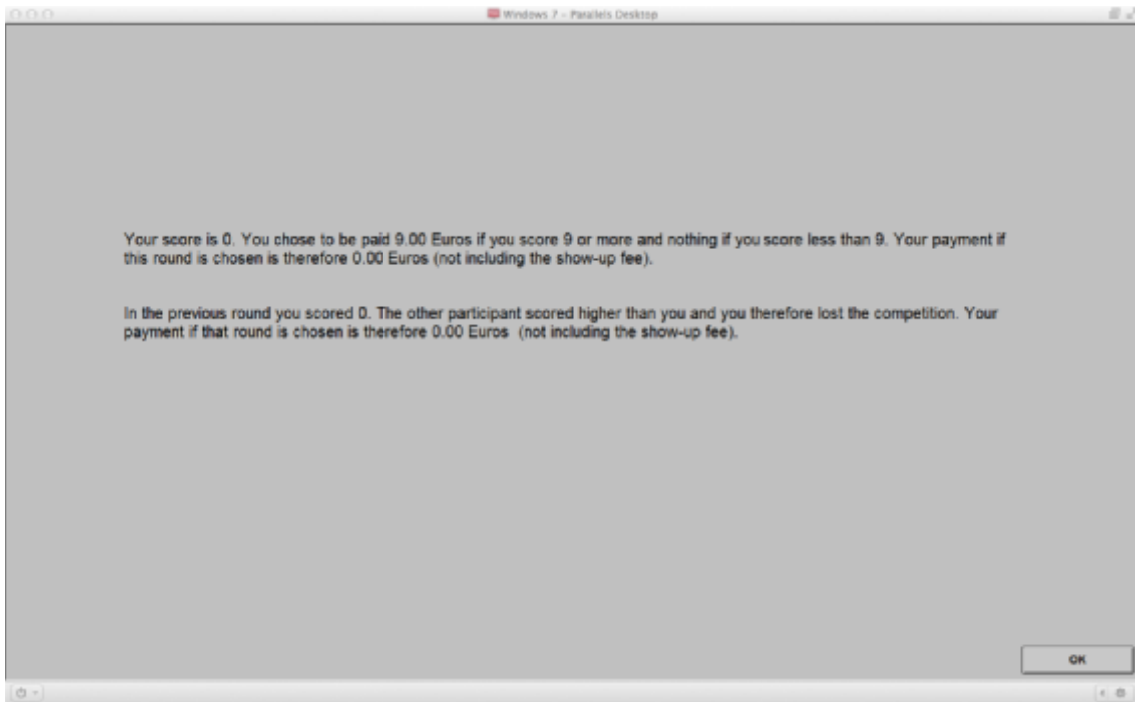

Windows 7 - Parallels Desktop

Before we inform you which round was randomly chosen for your payment, we would like to ask you a few short questions.

What is your gender?  Male  
 Female

What is your age:

OK

Windows 7 - Parallels Desktop

How do you see yourself. Are you generally a person who is fully prepared to take risks or do you try to avoid taking risks?  
Please choose a value on the scale below, where the value 0 means "unwilling to take risks" and the value 10 means "fully prepared to take risk".

0=Unwilling to take risks ○○○○○○○○○○○○ 10=Fully prepared to take risk

How competitive do you consider yourself to be?  
Please choose a value on the scale below, where the value 0 means "not competitive at all" and the value 10 means "very competitive".

0=not competitive at all ○○○○○○○○○○○○ 10=Very competitive

OK

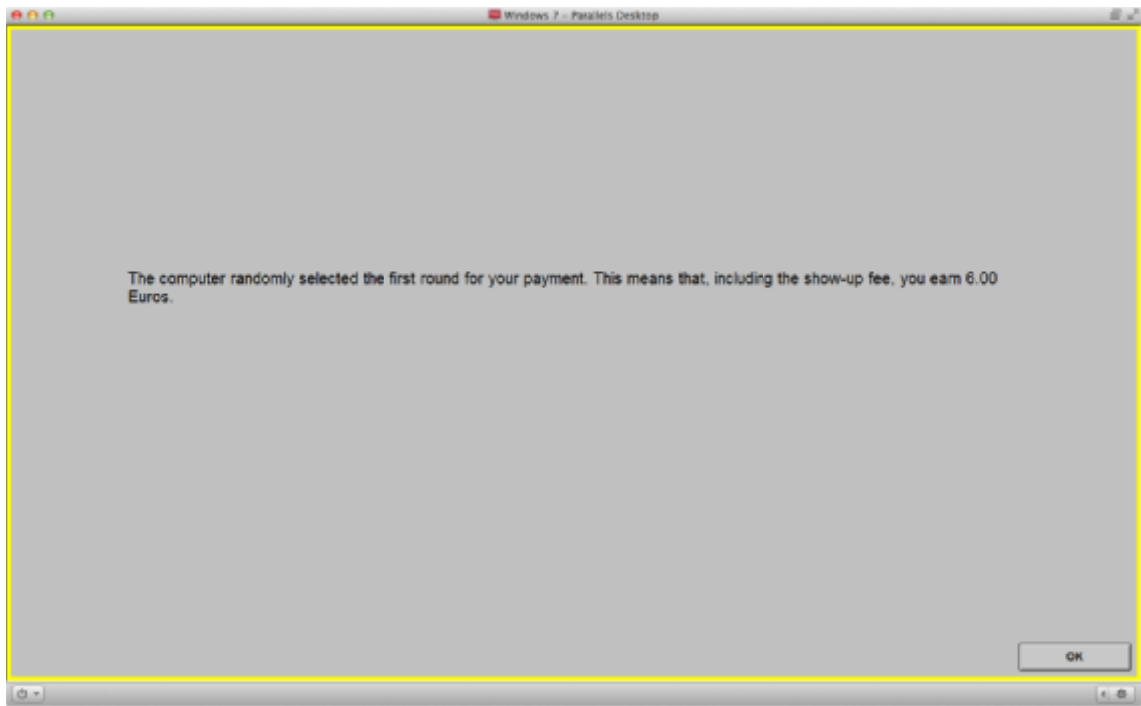

## Screen shots (supplementary experiment)

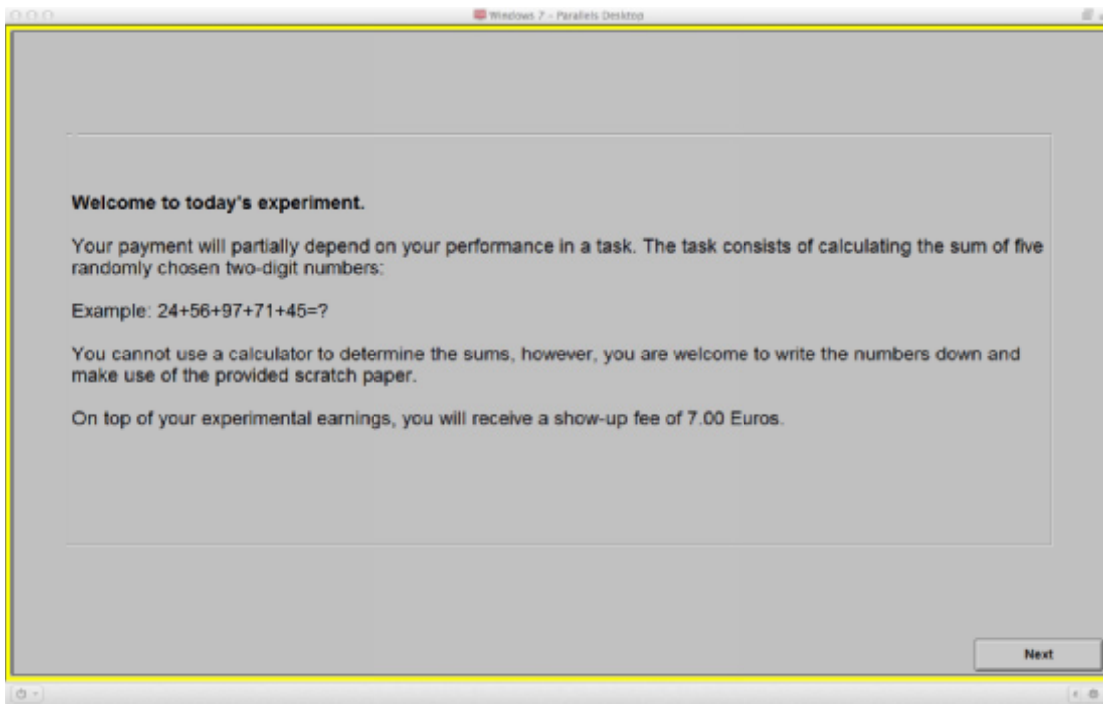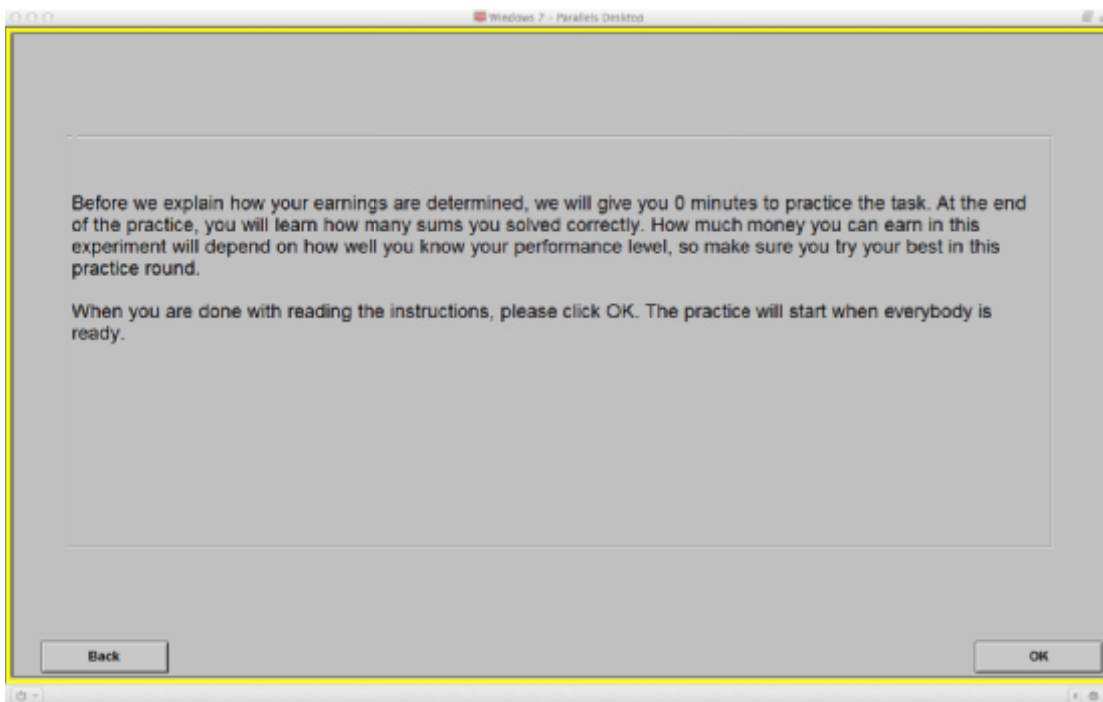

230  
seconds

$$94 + 66 + 45 + 96 + 37 = \text{[input field]} \text{ [OK]}$$

You scored 0 correct answers.

OK

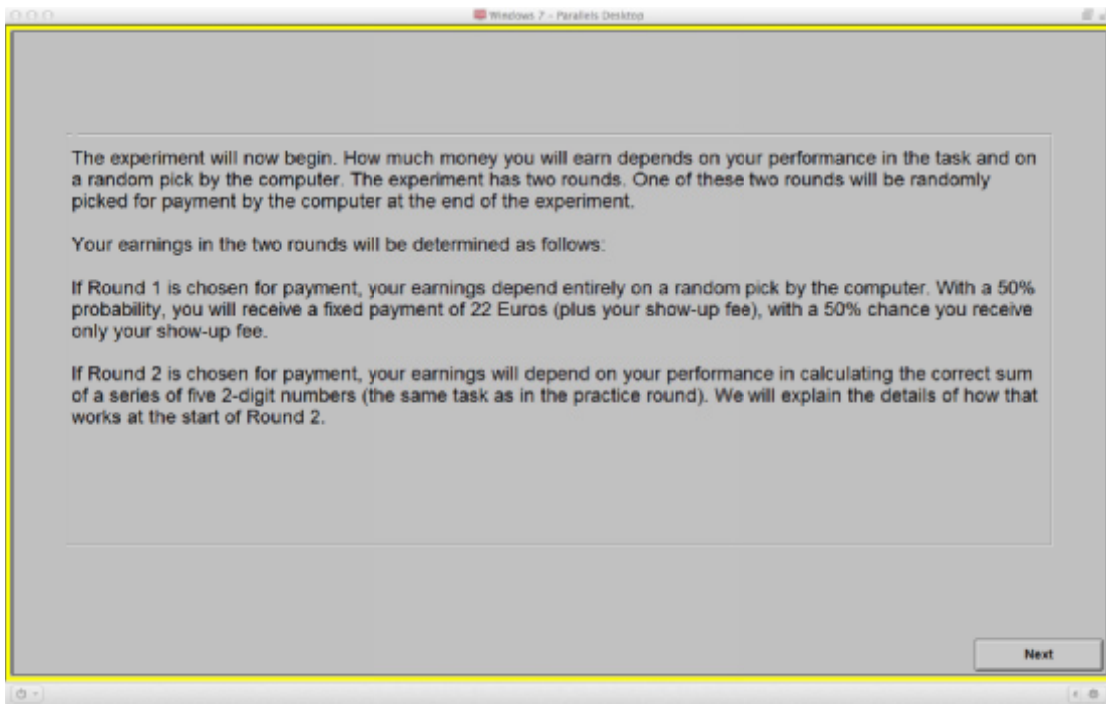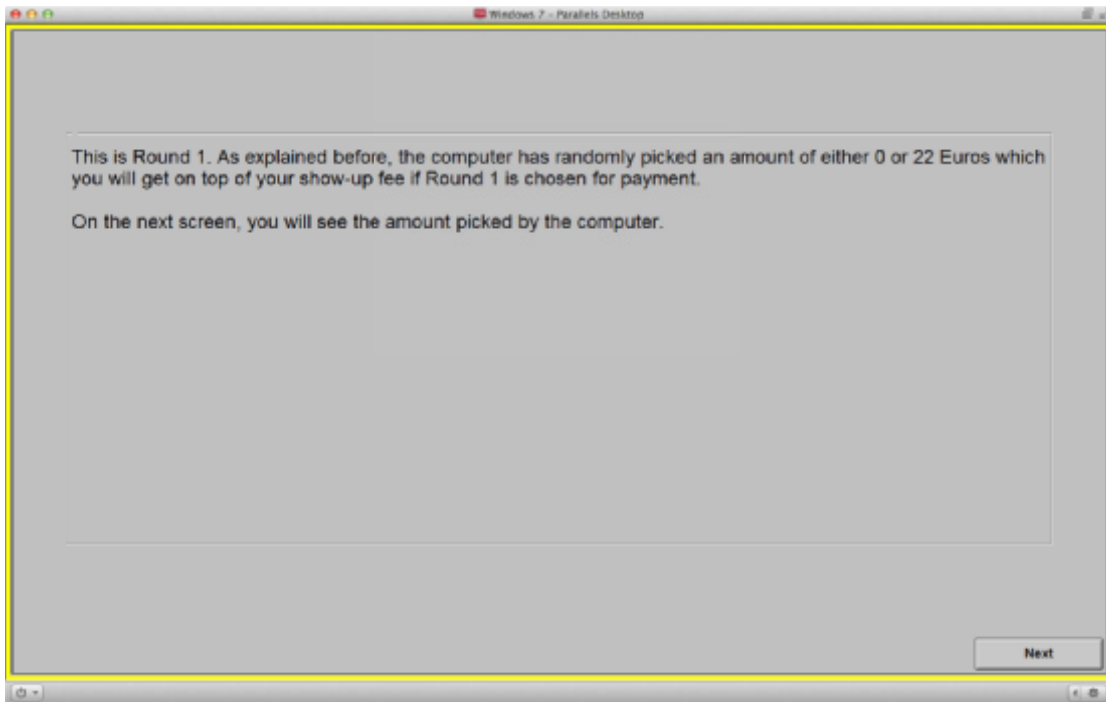

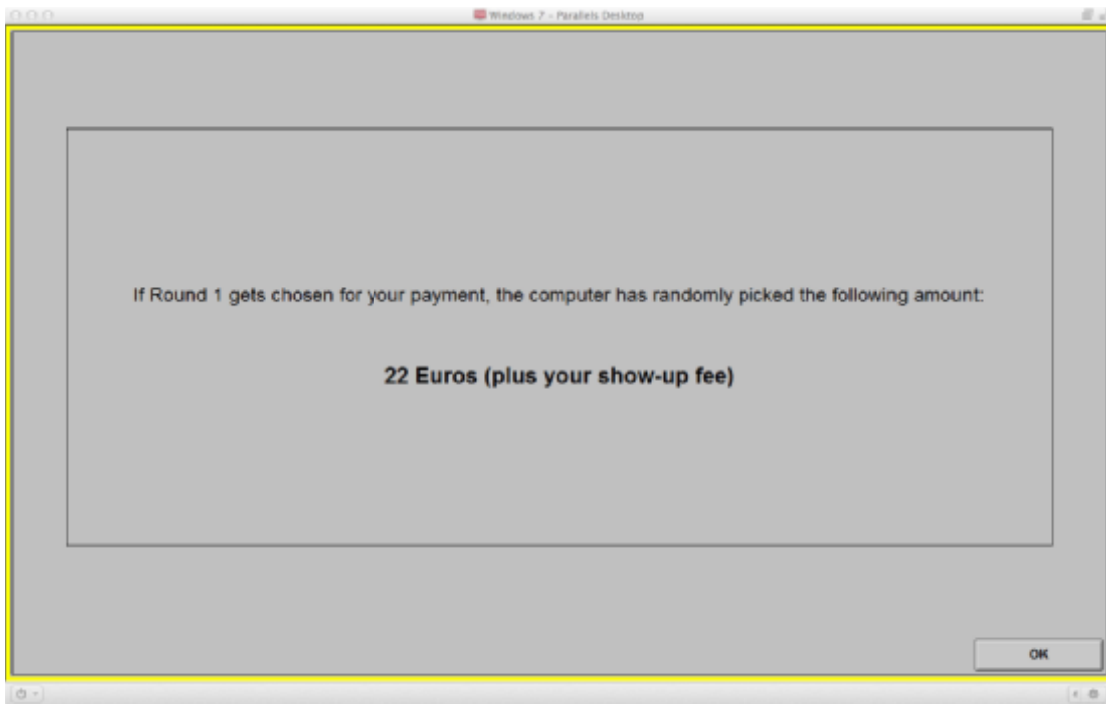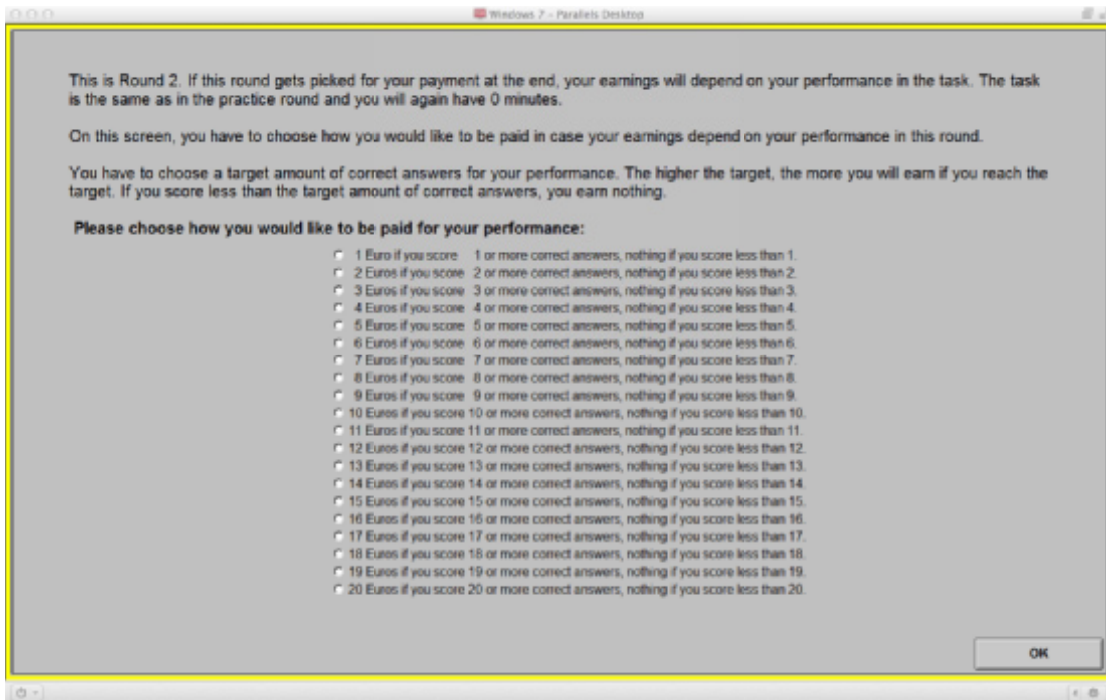

Before we tell you about the random pick of the computer and how much you earned, we would like to ask you a few short questions.

What is your gender?  Male  
 Female

What is your age

OK

How do you see yourself. Are you generally a person who is fully prepared to take risks or do you try to avoid taking risks?  
Please choose a value on the scale below, where the value 0 means "unwilling to take risks" and the value 10 means "fully prepared to take risk".

0|unwilling to take risks ○○○○○○○○○○○○10|Fully prepared to take risk

How competitive do you consider yourself to be?  
Please choose a value on the scale below, where the value 0 means "not competitive at all" and the value 10 means "very competitive".

0|not competitive at all ○○○○○○○○○○○○10|very competitive

OK

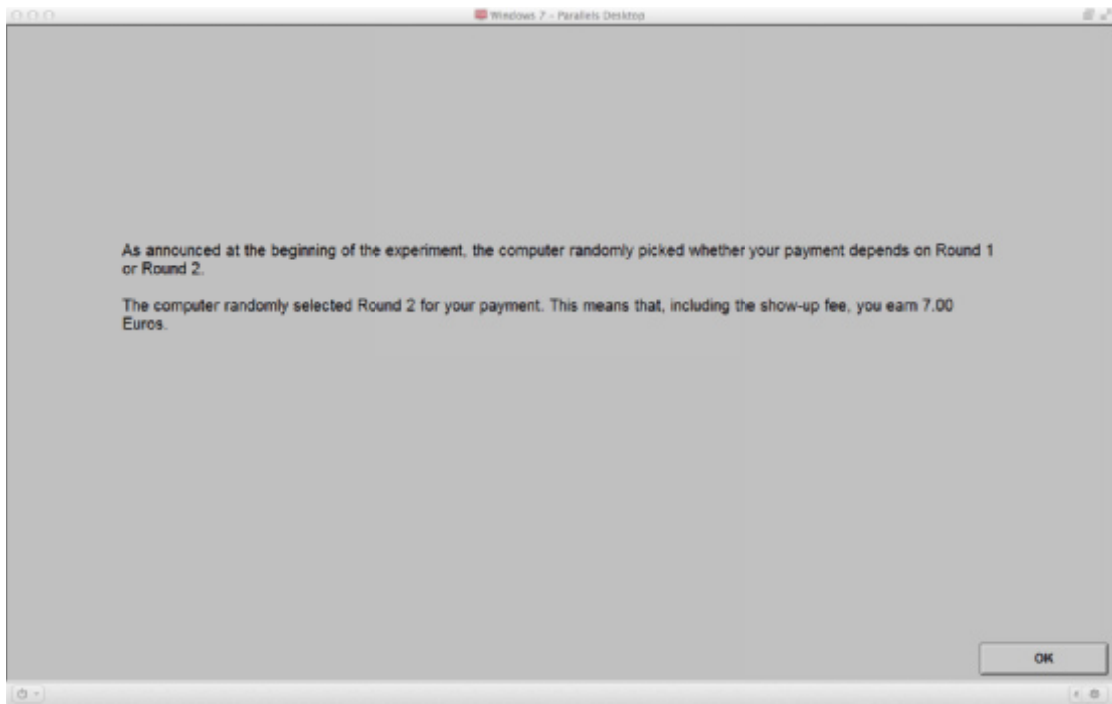

Supplement: mnsc.2015.2321-sm-online_appendix.pdf [file mnsc.2015.2321-sm-online_appendix.pdf]
